# Supplementary material
Source: PubMed Central journal article supplement (PMC4104599)
Supplement: NIHMS597078-supplement-01.pdf [file NIHMS597078-supplement-01.pdf]

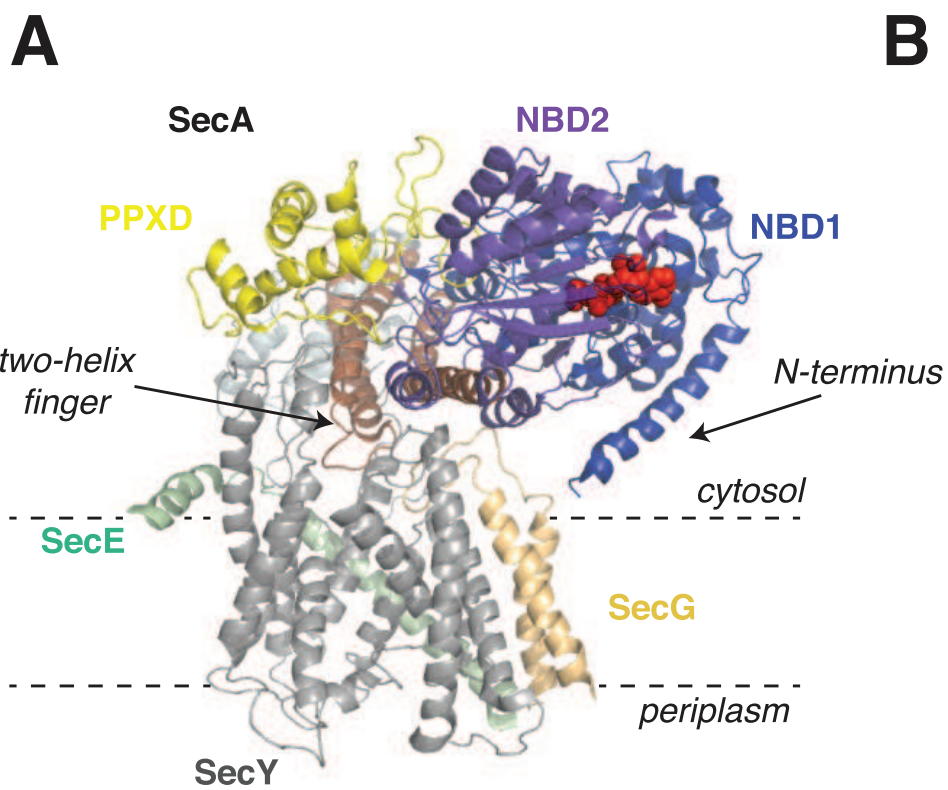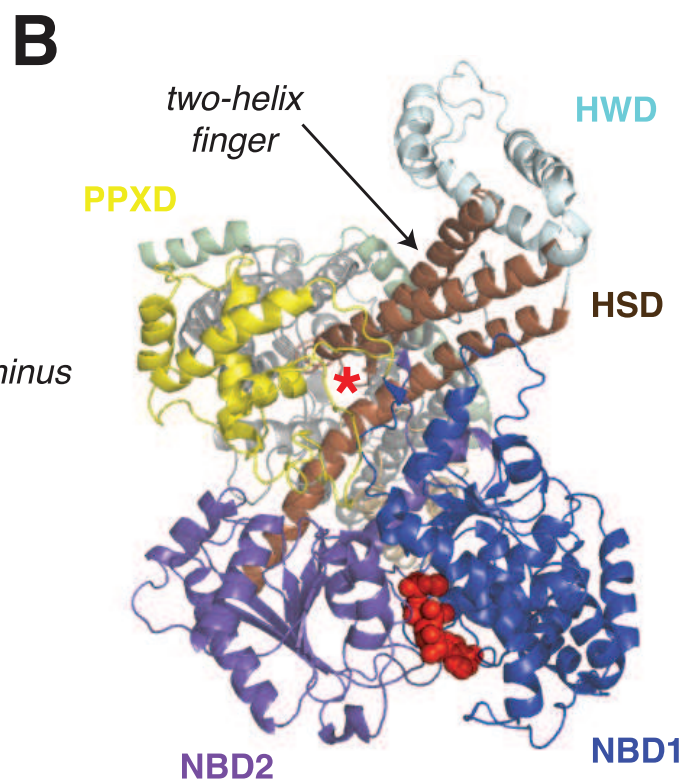

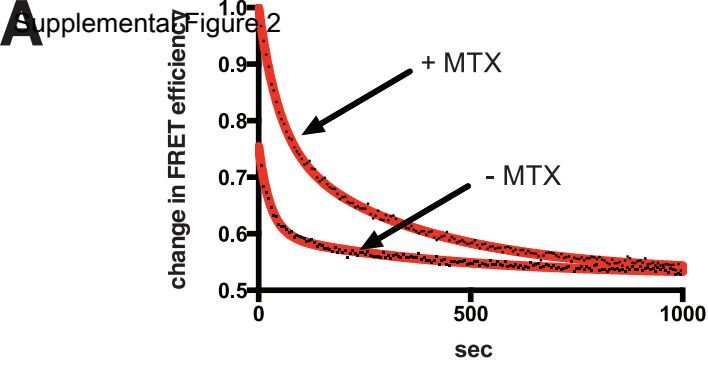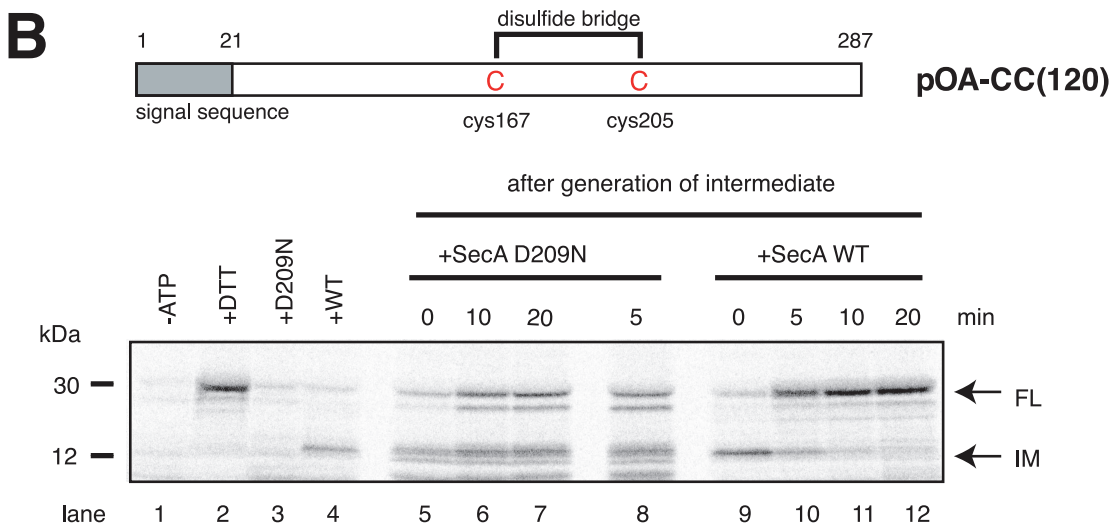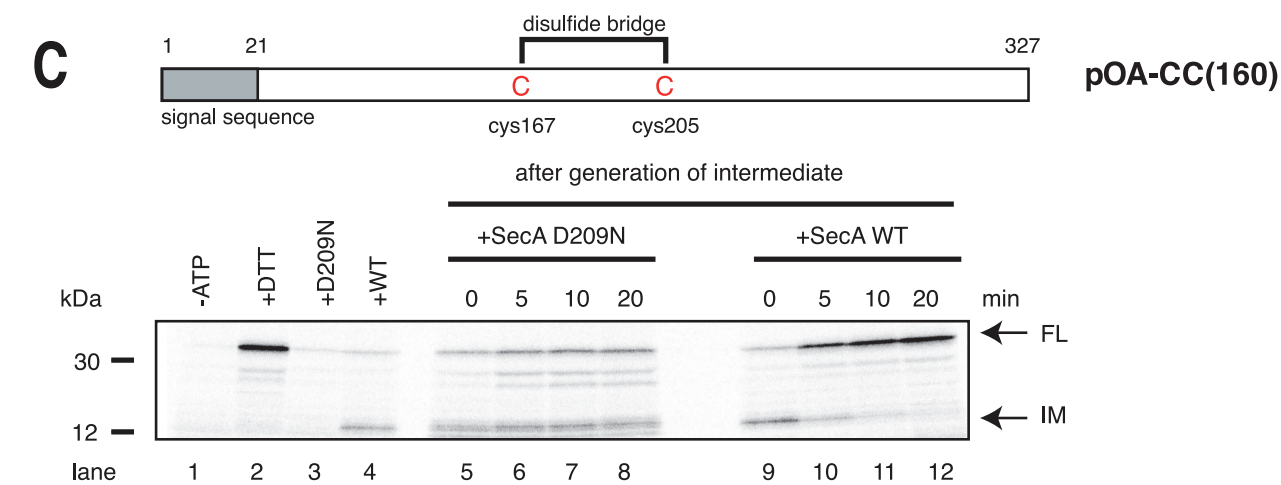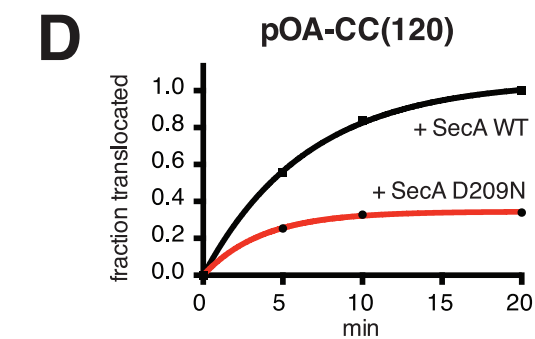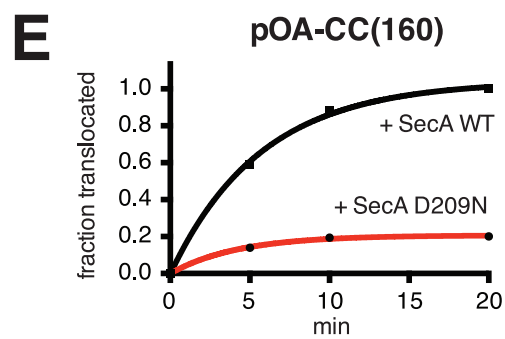

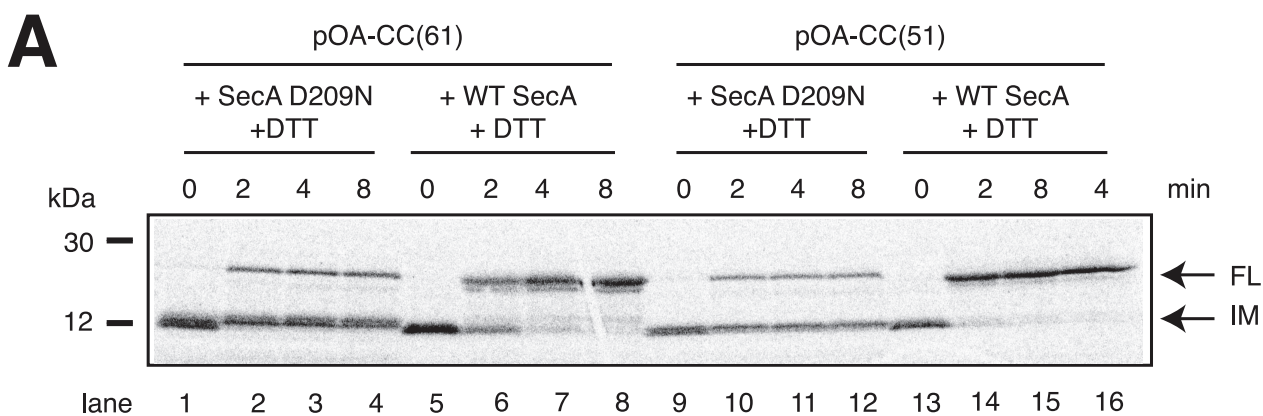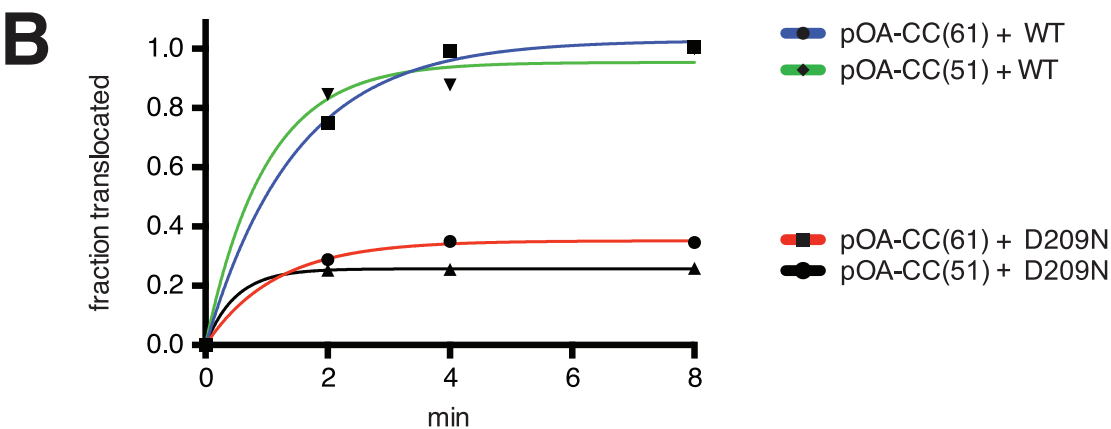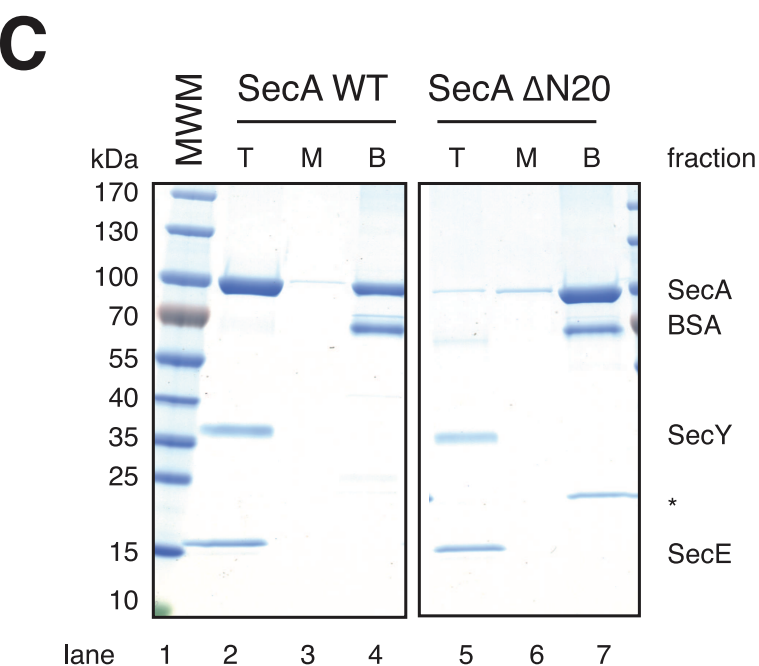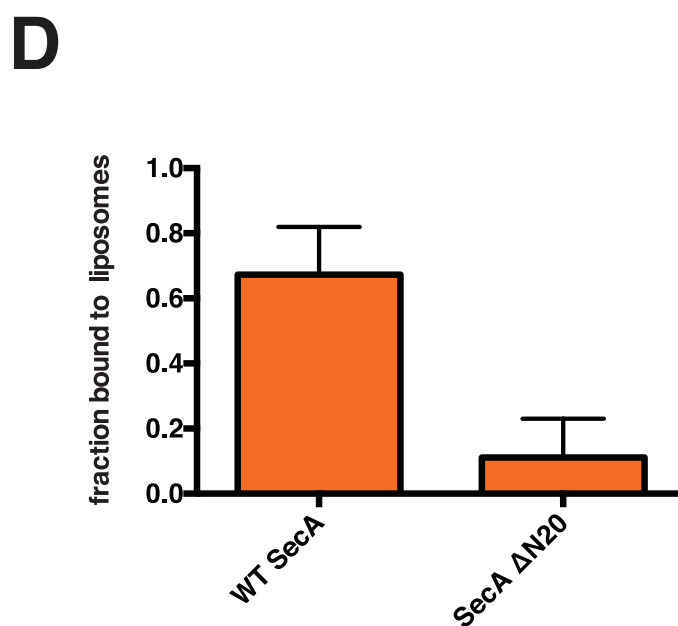



**A**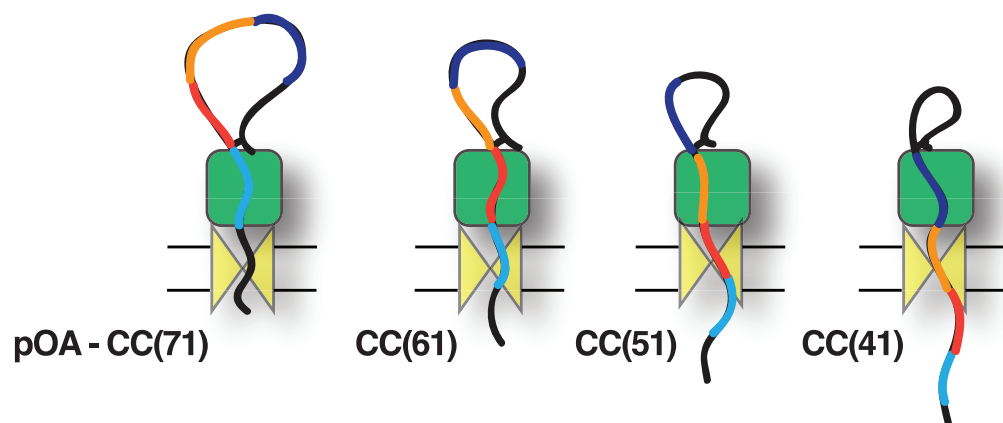**B**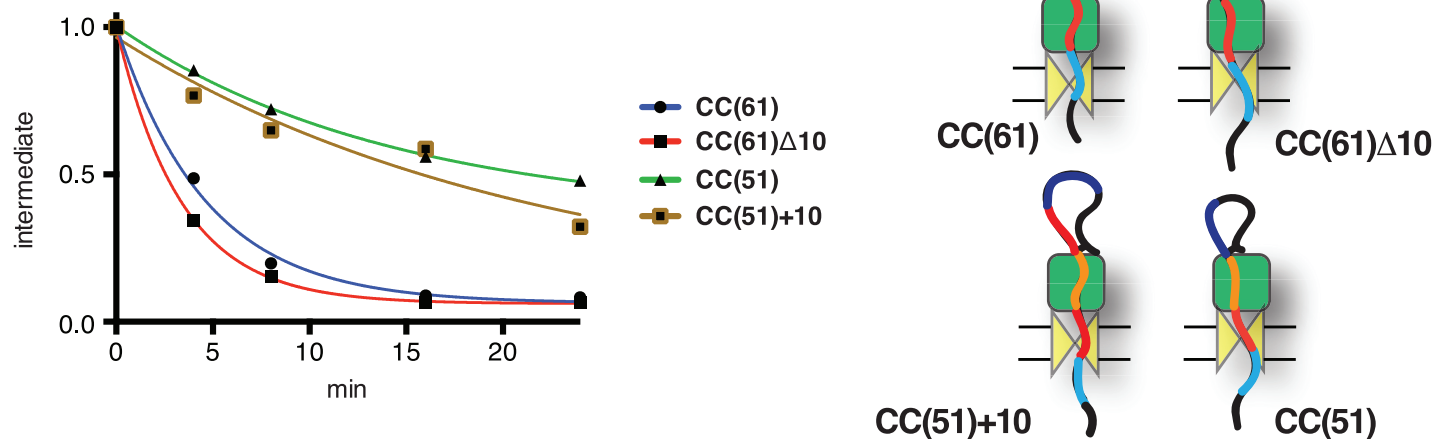**C**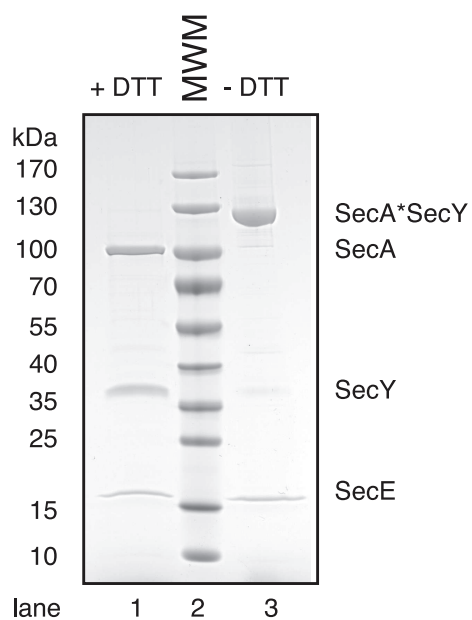**D**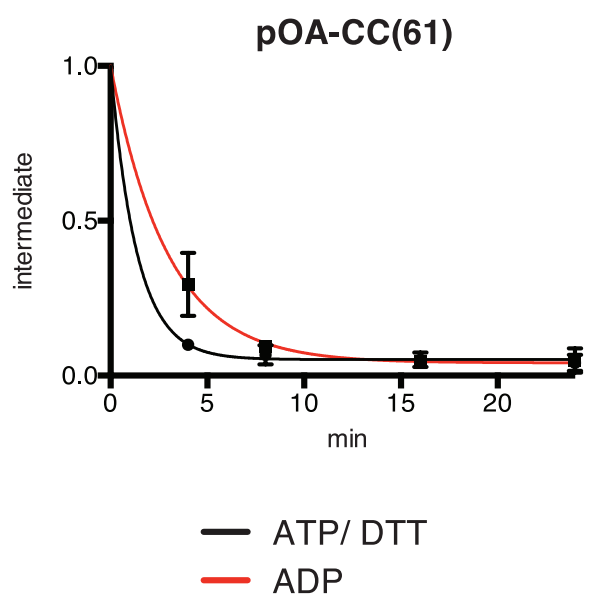

**A**

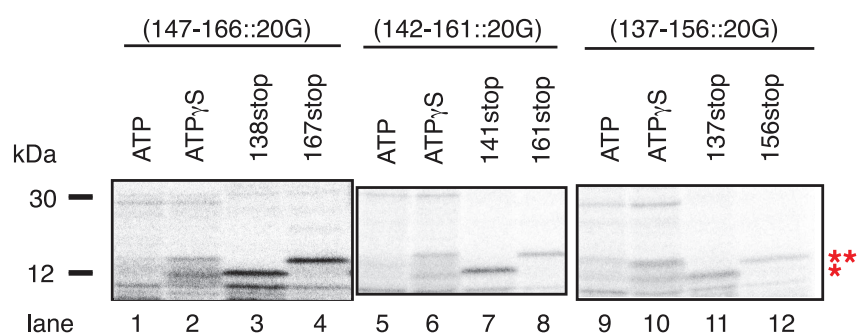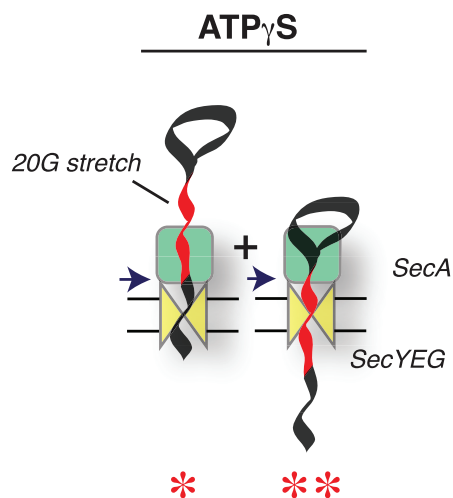

**B**

| 167                                                               | 205 | 228                             | # glycines |
|-------------------------------------------------------------------|-----|---------------------------------|------------|
| CLETNNIGDAHTISARGMGESNPVTGNTSDNVKQRAALIDCLAPDRRVEIEVKGIKDVVTPQQA* |     | pOA-CC(61)                      | 5          |
| CLETNNGGDGHTGSGRGMGESNPVTGNTSDNGKQRGGGGDCGGPDRRGELEGKGGKDGTTQPQG* |     | pOA d(A,V,I,L)                  | 23         |
| CLEGGGIGGAGGI GACGMGGGGPVGGGGGGVGGGAALIGCLAPGGGVGIGVGGIGGVVGGPGA* |     | pOA d(S,T,N,Q,R,K,H,D,E)        | 37         |
| CLEGGGGGDGHGGGGRGMGEGGPGGGGGGDGGKGRGGGGDCGGPDRRGELEGKGGKDGTTQPQG* |     | pOA d(A,V,I,L,S,T,N,Q)          | 40         |
| CLETNNGGGGGTGSGGMGGSNPVTGNTSGNGGQGGGGGGCGPGGGGGGGGGGGGGGTQPQG*    |     | pOA d(A,V,I,L,R,K,H,D,E)        | 40         |
| CLETNNIGDAHTISARGMGESNPVTGNTSDNVKQRAALIDCMMMM*                    |     | pOA-CC(61) 1-205 4M             | 4          |
| CLEGGGGGDGHGGGGRGMGEGGPGGGGGGDGGKGRGGGGDCMMMM*                    |     | pOA d(A,V,I,L,S,T,N,Q) 1-205 4M | 27         |

**C**

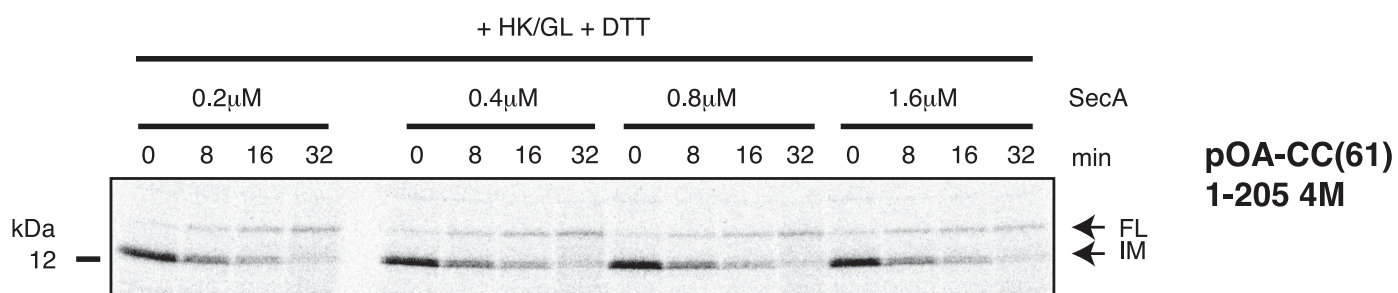

**D**

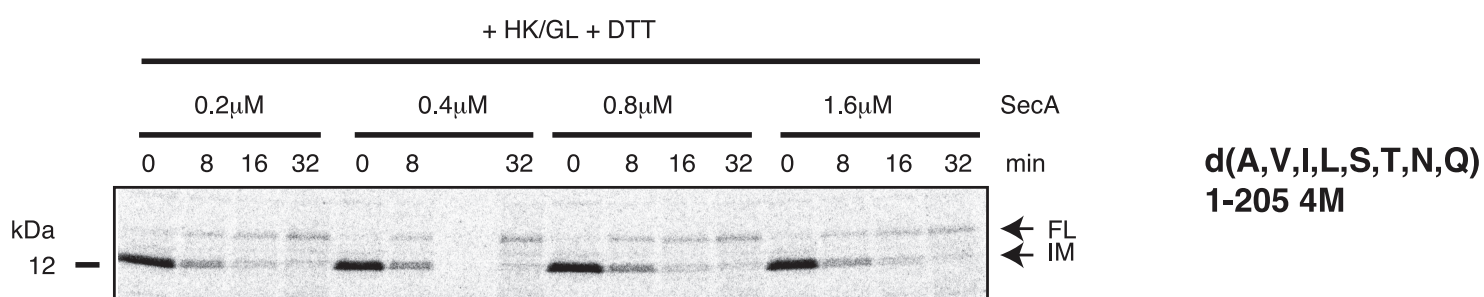

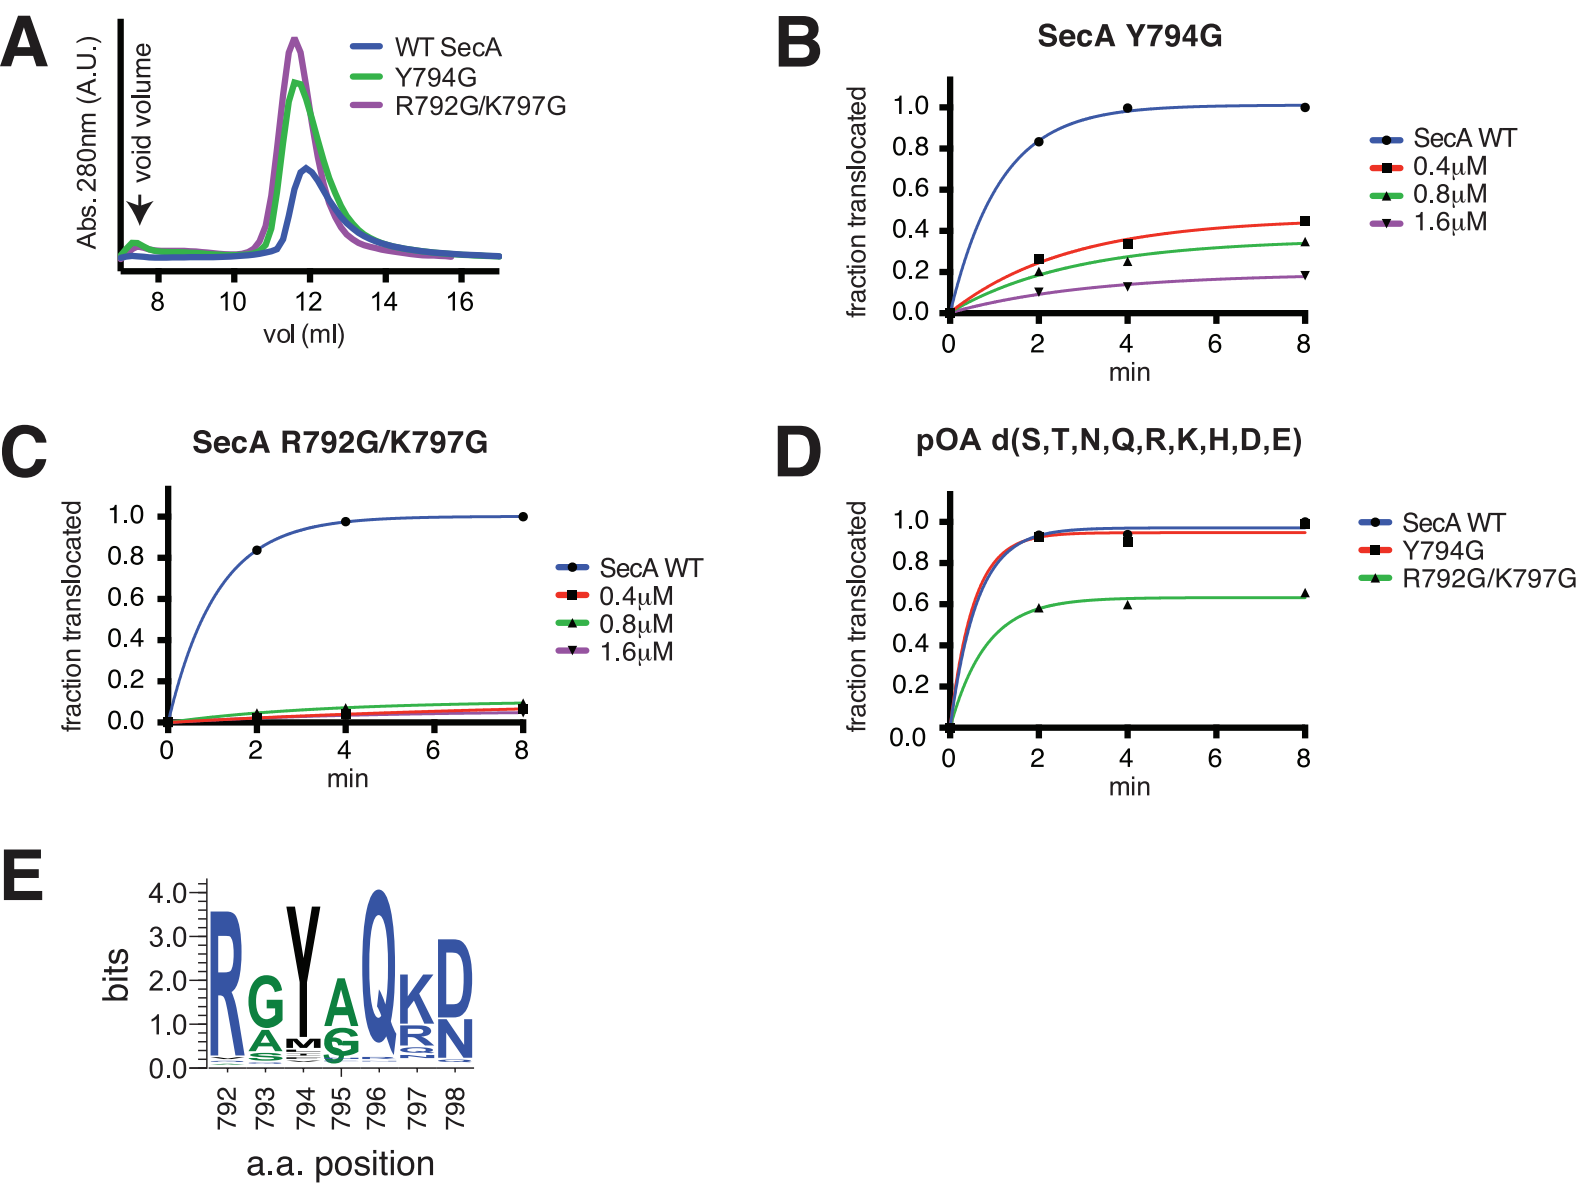

# Cell Conflict of Interest Form

Cell Press, 600 Technology Square, 5th floor, Cambridge, MA 02139, USA

**Please complete this form electronically and upload the file with your final submission.**

Cell requires all authors to disclose any financial interest that might be construed to influence the results or interpretation of their manuscript.

As a guideline, any affiliation associated with a payment or financial benefit exceeding \$10,000 p.a. or 5% ownership of a company or research funding by a company with related interests would constitute a financial interest that must be declared. This policy applies to all submitted research manuscripts and review material.

Examples of statement language include: AUTHOR is an employee and shareholder of COMPANY; AUTHOR is a founder of COMPANY and a member of its scientific advisory board. This work was supported in part by a grant from COMPANY.

Please disclose any such interest below on behalf of all authors of this manuscript.

---

**Please check one of the following:**

- None of the authors of this manuscript have a financial interest related to this work.  
 Please print the following disclosure statement in the Acknowledgments section:

**Please provide the following information:**

Please check this box to indicate that you have asked every author of this work to declare any conflicts of interest. Your answers on this form are on behalf of every author of this work.

Manuscript # (research articles only): CELL-D-13-02114R2

Title: A "push and slide" mechanism allows sequence-insensitive translocation of secretory proteins by the SecA ATPase

Author list: Benedikt W. Bauer, Tom Shemesh, Yu Chen, and Tom A. Rapoport

Your name: Benedikt Bauer

Date: 03/21/14
